# Supplementary material for: 2,4-Dihydroxypyrimidine is a potential urinary metabolite biomarker for diagnosing bipolar disorder
Source: Royal Society of Chemistry journal article supplement (doi:10.1039/c3mb70614a), 2014-01-14

**Supplemental Figure 1.** PCA analysis showed that the BD subjects were obviously discriminated from the healthy controls.

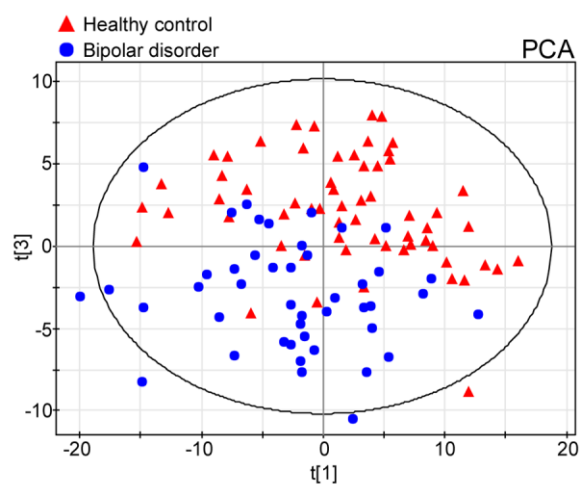

Supplement: c3mb70614a.pdf [file c3mb70614a.pdf]
