# Supplementary material for: 2,4-Dihydroxypyrimidine is a potential urinary metabolite biomarker for diagnosing bipolar disorder
Source: Royal Society of Chemistry journal article supplement (doi:10.1039/c3mb70614a), 2014-01-14
Supplement: c3mb70614a_2.pdf [file c3mb70614a_2.pdf]

**Supplemental Table 1. Demographic and Clinical Details of BD Subjects and controls <sup>a</sup>**

|                                                    | <b>BD</b>   | <b>HC</b>   | <b>P <sup>b</sup></b> |
|----------------------------------------------------|-------------|-------------|-----------------------|
| <b>Sample Size</b>                                 | 19          | 20          | -                     |
| <b>Sex (M/F)</b>                                   | 8/11        | 9/11        | 0.855                 |
| <b>Age (years)<sup>c</sup></b>                     | 30.63±11.56 | 29.95±10.29 | 0.847                 |
| <b>2,4-dihydroxypyrimidine (ug/ml)<sup>c</sup></b> | 5.01±4.37   | 11.65±7.11  | 0.001                 |

<sup>a</sup> Abbreviations: HC: Healthy controls; BD: Bipolar disorder; M/F: male/female;

<sup>b</sup> Two-tailed student *t*-test for continuous variables (age); Chi-square analyses for categorical variables (sex).

<sup>c</sup> Values expressed as means ± SDs.
